# Supplementary material
Source: PubMed Central journal article supplement (PMC4561709)
Supplement: AEM.01349-15_zam999116616so1.pdf [file AEM.01349-15_zam999116616so1.pdf]

**Table S1: List of Plasmids used in this study**

| <b>Plasmid Name</b> | <b>Description</b>                                                                               | <b>Source</b> |
|---------------------|--------------------------------------------------------------------------------------------------|---------------|
| <b>pSL2183</b>      | $P_{trc10}$ - <i>eyfp</i> in pPMQAK1 with RSF1010 origin of replication                          | Huang et al.  |
| <b>pSL2264</b>      | Targeting vector with pUC118 backbone for cloning $P_{trc10}$ - <i>eyfp</i> into NSC1            | This study    |
| <b>pSL2267</b>      | Targeting vector with pUC118 backbone for cloning $P_{trc10}$ - <i>eyfp</i> into NSC2            | This study    |
| <b>pSL2268</b>      | Targeting vector with pUC118 backbone for cloning $P_{trc10}$ - <i>eyfp</i> into NS-pCA-1        | This study    |
| <b>pSL2269</b>      | Targeting vector with pUC118 backbone for cloning $P_{trc10}$ - <i>eyfp</i> into NS-pCB-1        | This study    |
| <b>pSL2270</b>      | Targeting vector with pUC118 backbone for cloning $P_{trc10}$ - <i>eyfp</i> into NS-pCC-1        | This study    |
| <b>pSL2307</b>      | Targeting vector with pUC118 backbone for cloning $P_{trc10}$ - <i>eyfp</i> into NS-pCA-2        | This study    |
| <b>pSL2308</b>      | Targeting vector with pUC118 backbone for cloning $P_{trc10}$ - <i>eyfp</i> into NS-pCB-2        | This study    |
| <b>pSL2309</b>      | Targeting vector with pUC118 backbone for cloning $P_{trc10}$ - <i>eyfp</i> into NS-pCC-2 (NSP1) | This study    |
| <b>pSL2383</b>      | pSL2264 with $P_{cpc560}$ - <i>eyfp</i>                                                          | This study    |
| <b>pSL2387</b>      | pSL2309 with $P_{cpc560}$ - <i>eyfp</i>                                                          | This study    |
| <b>pSL2392</b>      | pSL2183 with $P_{cpc560}$ - <i>eyfp</i>                                                          | This study    |

**Huang H-H, Camsund D, Lindblad P, Heidorn T.** 2010. Design and characterization of molecular tools for a Synthetic Biology approach towards developing cyanobacterial biotechnology. *Nucleic Acids Res* **38**:2577–2593.

Figure S1: Growth Curves for mutants used in this study

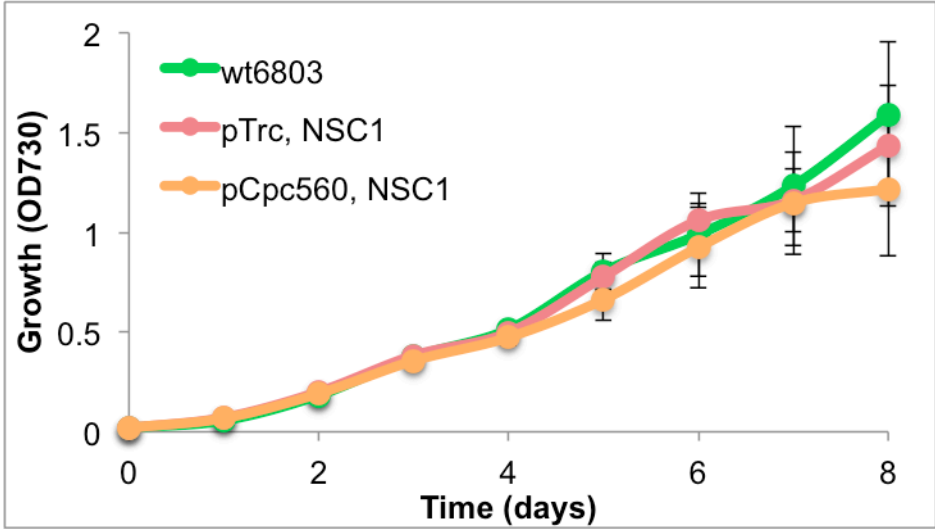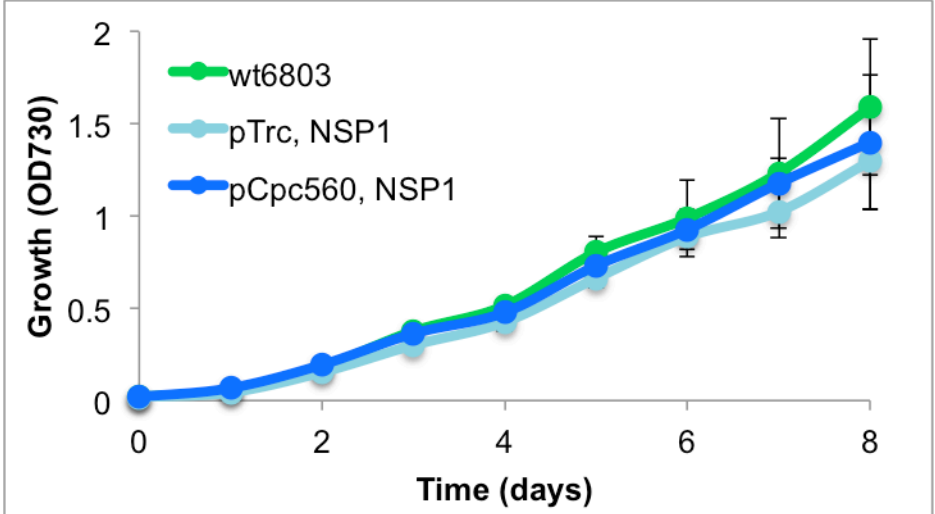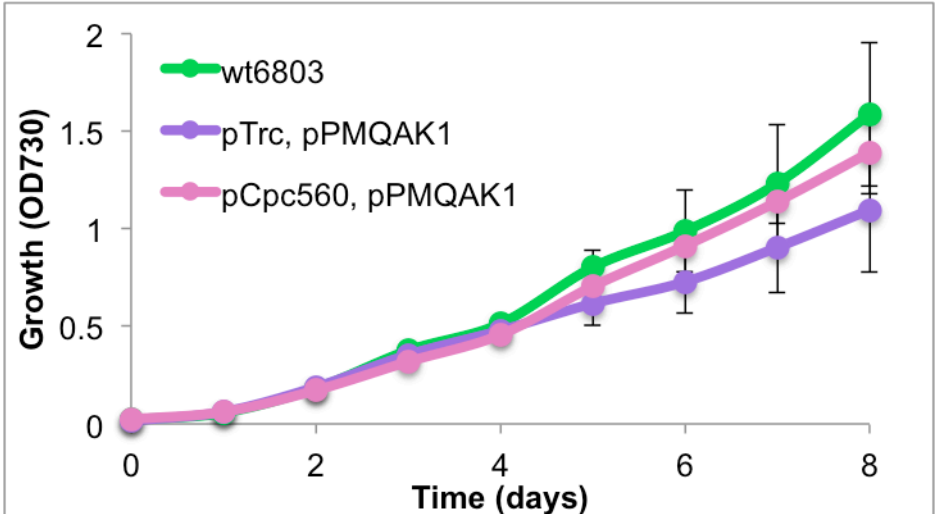

**Table S2: List of primers used in this study**

| Primer Name  | Sequence 5' -> 3'                                            | Purpose of Primer                                                                    |
|--------------|--------------------------------------------------------------|--------------------------------------------------------------------------------------|
| NSC1DS_F     | ACACCATCGATTCCCACGCTTGCTC<br>TTTTTCCTGGGTGT                  | Amplify downstream homologous region of NSC1                                         |
| NSC1DS_R     | TACAGGGCGCGTACTATGGTTCGGC<br>AATAACCATCCCCCAATCAGAAAG<br>GC  |                                                                                      |
| NSC1US_F     | CGGTTCCCTGGCCTTTTGCTGGGCAA<br>TGCCCACTCCTCCACAGGCGGTGAG<br>G | Amplify upstream homologous region of NSC1                                           |
| NSC1US_R     | GGTACCATGGCCGATTGTCTTGATT<br>CAAAC TTGTT CATGG               |                                                                                      |
| NSC1Exp_F    | AGACAATCGGCCATGGTACCCTCT<br>GCCAGTGTACAACC                   | Amplify expression cassette ( <i>eyfp</i> and <i>kanR</i> ) for assembly into SL2264 |
| NSC1Exp_R    | AGCGTGGGAATCGATGGTGTCAACG<br>TAAATGCATGCCGCT                 |                                                                                      |
| NSC1pUC118_F | GGGATGGTTATTGCCGAACCATAGT<br>ACGCGCCCTGTAGC                  | Amplifying backbone of pUC118 for assembly into pSL2264                              |
| NSC1pUC118_R | TGTGGAGGAGTGGGCATTGCAAGGC<br>CAGCAAAAAGGCCAGGAACCG           |                                                                                      |
| NSC2DS_F     | CGGCATGCATTTACGTTGACATTCA<br>GTCCTCGTTAAGGGTAGG              | Amplify downstream homologous region of NSC2                                         |
| NSC2DS_R     | CGGTTCCCTGGCCTTTTGCTGATGGC<br>CAACTTAGTCGTACTCTGCG           |                                                                                      |
| NSC2US_F     | ACAGGGCGCGTACTATGGTTTTTGT<br>GGAGATCAGCCTTAGCCTGC            | Amplify upstream homologous region of NSC2                                           |
| NSC2US_R     | TGGTATTACCAATTAGCAGGGTCGA<br>AGATTCAGGAAAGCCTATAAGC          |                                                                                      |
| NSC2Exp_F    | CCTGCTAATTGGTAATACCATGGTA<br>CCGC                            | Amplify expression cassette ( <i>eyfp</i> and <i>kanR</i> ) for assembly into SL2267 |
| NSC2Exp_R    | TGTCAACGTAAATGCATGCCGC                                       |                                                                                      |
| NSC2pUC118_F | CAGCAAAAAGGCCAGGAACCG                                        | Amplify backbone of pUC118 for assembly into pSL2267                                 |
| NSC2pUC118_R | AACCATAGTACGCGCCCTGTAGC                                      |                                                                                      |
| NSpCA1_DS_F  | CGGCATGCATTTACGTTGACATCGC<br>GGATGACAAAATTTGCTG              | Amplify downstream homologous region of NSpCA1                                       |
| NSpCA1_DS_R  | TCCTGGCCTTTTGCTCGTTACTTCC<br>AAAGACCTGATCCAACCATCA           |                                                                                      |
| NSpCA1_US_F  | ACAGGGCGCGTACTATGGTTGAAGG<br>TGTTAACAGGTTATGGAAAAGC          | Amplify upstream homologous region of NSpCA1                                         |
| NSpCA1_US_R  | TGGTATTACCAATTAGCAGGGCATG<br>AAACTTAAGGGGACTTATCG            |                                                                                      |
| NSpCA1_DS_F  | CGGCATGCATTTACGTTGACATCGC<br>GGATGACAAAATTTGCTG              | Amplify downstream homologous region of NSpCA1                                       |
| NSpCA1_DS_R  | TCCTGGCCTTTTGCTCGTTACTTCC<br>AAAGACCTGATCCAACCATCA           |                                                                                      |
| NSpCA1_US_F  | ACAGGGCGCGTACTATGGTTGAAGG<br>TGTTAACAGGTTATGGAAAAGC          | Amplify upstream homologous region of NSpCA1                                         |
| NSpCA1_US_R  | TGGTATTACCAATTAGCAGGGCATG<br>AAACTTAAGGGGACTTATCG            |                                                                                      |
| NSpCB1_DS_F  | CGGCATGCATTTACGTTGACGTGAA<br>CGCACCCTTGACTAACG               | Amplify downstream homologous region of NSpCB1                                       |
| NSpCB1_DS_R  | CGGTTCCCTGGCCTTTTGCTGTTAGA<br>CATTAGAACGCCCTGCC              |                                                                                      |
| NSpCB1_US_F  | ACAGGGCGCGTACTATGGTTCGTAT<br>CATAATCACGGGGTTATCG             | Amplify upstream                                                                     |

|                  |                                                                             |                                                                                                               |
|------------------|-----------------------------------------------------------------------------|---------------------------------------------------------------------------------------------------------------|
| NSpCB1_US_R      | TGGTATTACCAATTAGCAGGCCAGA<br>AACTCCCAAATTTGAC                               | homologous region of<br>NSpCB1                                                                                |
| NSpCC1_DS_F      | CGGCATGCATTTACGTTGACGGCAA<br>TAGTCCAAGATTTCC                                | Amplify downstream<br>homologous region of<br>NSpCC1                                                          |
| NSpCC1_DS_R      | CGGTTCCCTGGCCTTTTGCTGGAATT<br>GTTGGCAGATAGGGCACG                            |                                                                                                               |
| NSpCC1_US_F      | ACAGGGCGCTACTATGGTTGCGTA<br>TGACTCTTTTAGCATCC                               | Amplify upstream<br>homologous region of<br>NSpCC1                                                            |
| NSpCC1_US_R      | TGGTATTACCAATTAGCAGGTGTGC<br>CTATCCCTTTGTCAAGAG                             |                                                                                                               |
| pSmall1ExpC_F    | CCTGCTAATTGGTAATACCATGGTA<br>CCGC                                           | Amplify expression cassette<br>( <i>eyfp</i> and <i>kanR</i> ) for<br>assembly into SL2268,<br>SL2269, SL2270 |
| pSmall1ExpC_R    | TGTCAACGTAAATGCATGCCGC                                                      |                                                                                                               |
| pSmallpUC118_F   | CAGCAAAAGGCCAGGAACCG                                                        | Amplify backbone of<br>pUC118 for assembly into<br>SL2268, SL2269, SL2270                                     |
| pSmallpUC118_R   | AACCATAGTACGCGCCCTGTAGC                                                     |                                                                                                               |
| NSpCA2_DS_F      | TGCATTTACGTTGACACCATCCCGT<br>TAACAGGTATAGCATAGCGATATAC<br>AGAA              | Amplify downstream<br>homologous region of<br>NSpCA2                                                          |
| NSpCA2_DS_R      | GCGAGGAAGCGGAAGAGCGCCCAAT<br>ACGCAAACCGCTCCAACAGTGACT<br>GGGTTAGCAC         |                                                                                                               |
| NSpCA2_US_F      | GCTGCAAGGCGATTAAGTTGGGTAA<br>CGCCGAAACACTTGATACTCTCCAA<br>GCGATTTTAG        | Amplify upstream<br>homologous region of<br>NSpCA2                                                            |
| NSpCA2_US_R      | TGTAACACTGGCAGAGCGGTCGGGA<br>AACGTACAACGACCAAAAA                            |                                                                                                               |
| NSpCA2Exp_F      | TGGTCGTTGTACGTTTCCCGACCGC<br>TCTGCCAGTGT                                    | Amplify expression cassette<br>( <i>eyfp</i> and <i>kanR</i> ) for<br>assembly into SL2307                    |
| NSpCA2Exp_R      | ATGCTATACCTGTTAACGGGATGGT<br>GTCAACGTAAATGCATGCC                            |                                                                                                               |
| NSpCB2_DS_F      | GGCATGCATTTACGTTGACATTCAA<br>ACAAATATTAATACTCATTATGAC<br>TTTATCACTAGACTCGG  | Amplify downstream<br>homologous region of<br>NSpCB2                                                          |
| NSpCB2_DS_R      | GCGGAGCCTATGGAAAAACGCCAGC<br>AACGCGGCCTTTTTAAACACCCTCG<br>ATAAGTTTCCCTGT    |                                                                                                               |
| NSpCB2_US_F      | CGCCGCGCTTAATGCGCCGCTACAG<br>GGCGCTACTATGGTTGTCTCGACT<br>TCTGGTGATATGGACTCT | Amplify downstream<br>homologous region of<br>NSpCB2                                                          |
| NSpCB2_US_R      | TGGTATTACCAATTAGCAGGTGTTA<br>ATGCCCAAAGGAAATAGCATCAAGC                      |                                                                                                               |
| NSpCB2Exp_F_2308 | ATTTCCTTTGGGCATTAACACCTGC<br>TAATTGGTAATACCATGGTACC                         | Amplify expression cassette<br>( <i>eyfp</i> and <i>kanR</i> ) for<br>assembly into SL2308                    |
| NSpCB2Exp_R      | GTATTTAATATTTGTTTGAATGTCA<br>ACGTAATGCATGCCG                                |                                                                                                               |
| NSpCB2Exp_F_2309 | AACTGATAGAAATCTCTGATCCTGC<br>TAATTGGTAATACCATGGTACC                         | Forward primer for<br>expression cassette ( <i>eyfp</i><br>and <i>kanR</i> ) for assembly into<br>SL2309      |
| NSP1DS_F         | GGCATGCATTTACGTTGACAGGAGT<br>TTAGCCATGGGATTAGTCAGAGTCC                      | Amplify downstream<br>homologous region of NSP1                                                               |
| NSP1DS_R         | GCGGAGCCTATGGAAAAACGCCAGC<br>AACGCGGCCTTTTTAACGCCATCGC<br>TCGC              |                                                                                                               |

|                    |                                                                              |                                                                                            |
|--------------------|------------------------------------------------------------------------------|--------------------------------------------------------------------------------------------|
| NSP1US_F           | CGCCGCGCTTAATGCGCCGCTACAG<br>GGCGCGTACTATGGTATATAATCCC<br>GTTAACAGGCTAAACCCA | Amplify upstream<br>homologous region of NSP1                                              |
| NSP1US_R           | TGGTATTACCAATTAGCAGGATCAG<br>AGATTTCTATCAGTTCCCCAGC                          |                                                                                            |
| NSP1Exp_F          | AACTGATAGAAATCTCTGATCCTGC<br>TAATTGGTAATACCATGGTACC                          | Amplify expression cassette<br>( <i>eyfp</i> and <i>kanR</i> ) for<br>assembly into SL2309 |
| NSP1Exp_R          | TAATCCCATGGCTAAACTCCTGTCA<br>ACGTAAATGCATGCCGC                               |                                                                                            |
| pSmall2pUC118_F    | TAAAAAGGCCGCGTTGCTGG                                                         | Amplify backbone of<br>pUC118 for assembly into<br>pSL2307, pSL2308,<br>pSL2309            |
| pSmall2pUC118_R    | ACCATAGTACGCGCCCTGT                                                          |                                                                                            |
| PromoterSwap_F     | GCGCGAAGGCGAAGCG                                                             | Amplifying backbone of<br>pSL2264 and pSL2309,<br>without $P_{Trc10}$                      |
| PromoterSwap_R     | ATGGTGAGCAAGGGCGAGG                                                          |                                                                                            |
| pCpc560swap_F      | GCCCTTGCTCACCATTGAATTAATC<br>TCCTACTTGACTTTATGAGTTGGG                        | Amplify $P_{cpc560}$ for assembly<br>into pSL2383, pSL2387,<br>pSL2392                     |
| pCpc560swap_R      | GCTTCGCCTTCGCGCACCTGTAGAG<br>AAGAGTCCCTGAATATCA                              | Reverse primer for<br>amplifying $P_{cpc560}$ for<br>assembly into pSL2383,<br>pSL2387     |
| pCpc560swap2183_R  | GTGAGCTGATACCGCACCTGTAGAG<br>AAGAGTCCCTGAATATCA                              | Reverse primer for<br>amplifying $P_{cpc560}$ for<br>assembly into pSL2392                 |
| 2183promoterswap_F | GCGGTATCAGCTCACTCAAAGG                                                       | Forward primer for<br>amplifying backbone of<br>pSL2183                                    |
| SL2264_seg_F       | CAATGCCCACTCCTCCACAG                                                         | For checking segregation<br>ratio for mutations in NSC1                                    |
| SL2264_seg_R       | ATCAGAAAGGCTAGGGTTGG                                                         |                                                                                            |
| SL2267_seg_F       | TGTGGAGATCAGCCTTTAGC                                                         | For checking segregation<br>ratio for mutations in NSC2                                    |
| SL2267_seg_R       | AGTCGTACTCTGCGCCGATC                                                         |                                                                                            |
| SL2309_seg_F       | AACAGGCTAAACCCATGCAG                                                         | For checking segregation<br>ratio for mutations in NSP1                                    |
| SL2309_seg_R       | AAGGGTCATACGTCATCGTG                                                         |                                                                                            |
